# Supplementary material for: Decadal radon cycles in a hot spring
Source: PubMed Central journal article supplement (PMC5608902; doi:10.1038/s41598-017-12441-0), 2017-09-21
Supplement: 41598_2017_12441_MOESM1_ESM.pdf [file 41598_2017_12441_MOESM1_ESM.pdf]

1 *Supplementary materials for*  
2 **Decadal radon cycles in a hot spring**

3 Rui Yan<sup>a, b, c</sup>, Heiko Woith<sup>d\*</sup>, Rongjiang Wang<sup>d</sup>, Guangcai Wang<sup>a, b</sup>

4 *a State Key Laboratory of Biogeology and Environmental Geology&MOE Key Laboratory of Groundwater Circulation and Environmental*  
5 *Evolution, China University of Geosciences, Beijing 100083, China.*

6 *b School of Water Resources and Environment, China University of Geosciences, Beijing 100083, China.*

7 *c China Earthquake Networks Center, 100045 Beijing, China.*

8 *d GFZ German Research Centre for Geosciences, D-14473 Potsdam, Germany*

9  
10  
11 This file contains (i) links to the data used in this study, and (ii) supplementary text  
12 and figures about the response of the hot spring to earthquakes, as well as details about  
13 radon solubility.

14  
15 **Data**

16 The daily monitoring data from the hot spring will be made available as persistent  
17 electronic data supplements (with its own doi) through GFZ German Research Centre for  
18 Geosciences. An example is shown at [http://gfzpublic.gfz-](http://gfzpublic.gfz-potsdam.de/pubman/faces/viewItemOverviewPage.jsp)  
19 [potsdam.de/pubman/faces/viewItemOverviewPage.jsp](http://gfzpublic.gfz-potsdam.de/pubman/faces/viewItemOverviewPage.jsp). Regional rainfall data were  
20 downloaded through CPC Merged Analysis of Precipitation (CMAP)  
21 (<http://www.esrl.noaa.gov/psd/data/gridded/data.cmap.html>). The hourly data of Galactic  
22 Cosmic Ray (GCR) monitored at McMurdo station, provided by Bartol Research Institute,  
23 were downloaded from [http://neutronm.bartol.udel.edu/~pyle/bri\\_table.html](http://neutronm.bartol.udel.edu/~pyle/bri_table.html). The NEIC  
24 (National Earthquake Information Center) earthquake catalog were downloaded from  
25 <http://earthquake.usgs.gov/earthquakes/search/>.

26 **Response to earthquakes**

27 Daily raw data of nearly 40 years of continuous monitoring are presented in [Fig. S1](#).  
28 The concentration of radon dissolved in water ranged between 39.9 Bq/L and 1836 Bq/L,  
29 water temperature fluctuated between 41.9°C and 93°C, discharge rate varied between  
30 0.0001 L/s and 0.02 L/s ([Table S1](#)). The wide range of parameters is due to a series of  
31 strong earthquakes which occurred next to the monitoring site in 1976.

32 **Table S1.** Descriptive statistics of the measurements at BLZ hot spring site: *N* - Number of daily samples; *N<sub>miss</sub>* -  
 33 Number of missing values; *Max<sub>gap</sub>* - Maximum gap length in days; *Min* - minimum; *Max*- maximum; *SD*- standard  
 34 deviation.

| Measurement          | Start_date   | N     | N <sub>miss</sub> | Max <sub>gap</sub> | Min    | Max    | Median | Mean   | SD    |
|----------------------|--------------|-------|-------------------|--------------------|--------|--------|--------|--------|-------|
| Radon (Bq/L)         | 1976 Apr. 6  | 14466 | 48                | 15                 | 39.9   | 1836.0 | 249.0  | 265.0  | 143.2 |
|                      | 1979 Jan. 1  | 13481 | 33                | 15                 | 40.7   | 696.0  | 242.0  | 246.0  | 101.3 |
| Temperature (°C)     | 1976 Apr. 6  | 14479 | 17                | 2                  | 41.9   | 93.0   | 85.8   | 85.4   | 3.5   |
|                      | 1979 Jan. 1  | 13503 | 11                | 2                  | 71.4   | 93.0   | 85.8   | 85.5   | 3.3   |
| Discharge rate (L/s) | 1976 Jun. 16 | 14412 | 21                | 10                 | 0.0001 | 0.02   | 0.011  | 0.0108 | 0.003 |
|                      | 1979 Jan. 1  | 13495 | 19                | 10                 | 0.003  | 0.02   | 0.011  | 0.011  | 0.003 |

35  
 36 **Table S2.** Coefficient estimates of a linear regression and standard error. The coefficients *a* and *b* correspond to  $y=ax+b$ .  
 37 *Se<sub>a</sub>* and *Se<sub>b</sub>* indicate standard errors of the coefficient estimates. *RMSE* means root mean square error.

| Measurement               | a         | Se <sub>a</sub> | b         | Se <sub>b</sub> | RMSE   |
|---------------------------|-----------|-----------------|-----------|-----------------|--------|
| Radon (Bq/L)              | -2.04E-03 | 1.19E-03        | 1732.59   | 871.19          | 98.16  |
| Temperature (°C)          | -4.09E-04 | 3.41E-05        | 384.20    | 24.89           | 2.80   |
| Discharge rate (L/s)      | -6.10E-07 | 2.22E-08        | 0.46      | 0.02            | 0.0018 |
| GCR (counts/hour/100)     | 7.95E-02  | 6.99E-03        | -48725.64 | 5102.15         | 574.88 |
| Atmosphere pressure (hPa) | -1.06E-04 | 9.97E-05        | 948.54    | 73.04           | 3.01   |
| Rainfall (mm/day)         | -1.40E-05 | 4.28E-05        | 13.73     | 31.20           | 3.52   |
| Monsoon Rainfall (mm/day) | -2.83E-02 | 1.36E-02        | 64.56     | 27.07           | 0.88   |

38  
 39  
 40 **Table S3** Variations of hydrogeological observations caused by earthquakes: *Lat, Lon* - latitude and longitude of  
 41 earthquake; *Mag, depth* - magnitude and depth of earthquake; *Azm, Dis* - azimuth and distance to the epicenter; *ED* -  
 42 energy density.

| Date (yyyy/mm/dd) | HH:MM:SS (UTC) | Lat (°) | Lon (°) | Mag (M) | Depth (km) | Azm (°) | Dis (km) | ED (J/m <sup>3</sup> ) | Radon (Bq/L) | Temperature (°C) | Discharge (L/s) |
|-------------------|----------------|---------|---------|---------|------------|---------|----------|------------------------|--------------|------------------|-----------------|
| 1976/05/29        | 12:23:18       | 24.57   | 98.95   | 6.9     | 8          | 108     | 29       | 48.661                 |              |                  |                 |
|                   | 14:00:18       | 24.53   | 98.71   | 7.0     | 10         | 166     | 14       | 634.194                |              |                  |                 |
|                   | 19:36:55       | 24.55   | 98.93   | 5.2     | 32         | 114     | 28       | 0.184                  |              |                  |                 |
| 1976/05/30        | 04:18:43       | 24.42   | 98.81   | 5.1     | 28         | 152     | 29       | 0.118                  | 359          | -5.5             | No measurement  |
|                   | 05:08:28       | 24.34   | 98.64   | 6.2     | 14         | 186     | 35       | 2.728                  |              |                  |                 |
| 1976/05/31        | 18:35:05       | 24.38   | 98.77   | 5.5     | 20         | 162     | 32       | 0.349                  |              |                  |                 |
|                   | 00:20:39       | 24.89   | 98.75   | 5.9     | 33         | 16      | 28       | 2.038                  | 757.4        | -6.5             |                 |
| 1976/06/09        | 00:20:39       | 24.89   | 98.75   | 5.9     | 33         | 16      | 28       | 2.038                  | 757.4        | -6.5             |                 |
| 1976/07/21        | 15:10:45       | 24.78   | 98.70   | 6.3     | 9          | 10      | 14       | 54.611                 | 1273         | -41.1            | -0.00781        |
| 1976/07/23        | 01:43:58       | 24.89   | 98.68   | 5.0     | 33         | 1       | 27       | 0.112                  | 1273         | -41.1            | -0.00781        |
| 1976/10/12        | 15:19:33       | 24.48   | 98.81   | 5.0     | 33         | 145     | 23       | 0.163                  | 132          | 4.1              | -0.00167        |
| 1996/02/03        | 11:14:20       | 27.29   | 100.28  | 6.6     | 11         | 29      | 334      | 0.011                  | 188          | -1.4             | -0.00130        |
| 2004/12/26        | 00:58:53       | 3.30    | 95.98   | 9.1     | 30         | 187     | 2392     | 0.123                  | 212.7        | -4.3             | -0.00313        |
| 2005/03/28        | 16:09:36       | 2.09    | 97.11   | 8.6     | 30         | 184     | 2514     | 0.020                  | 90           | No response      | No response     |

43

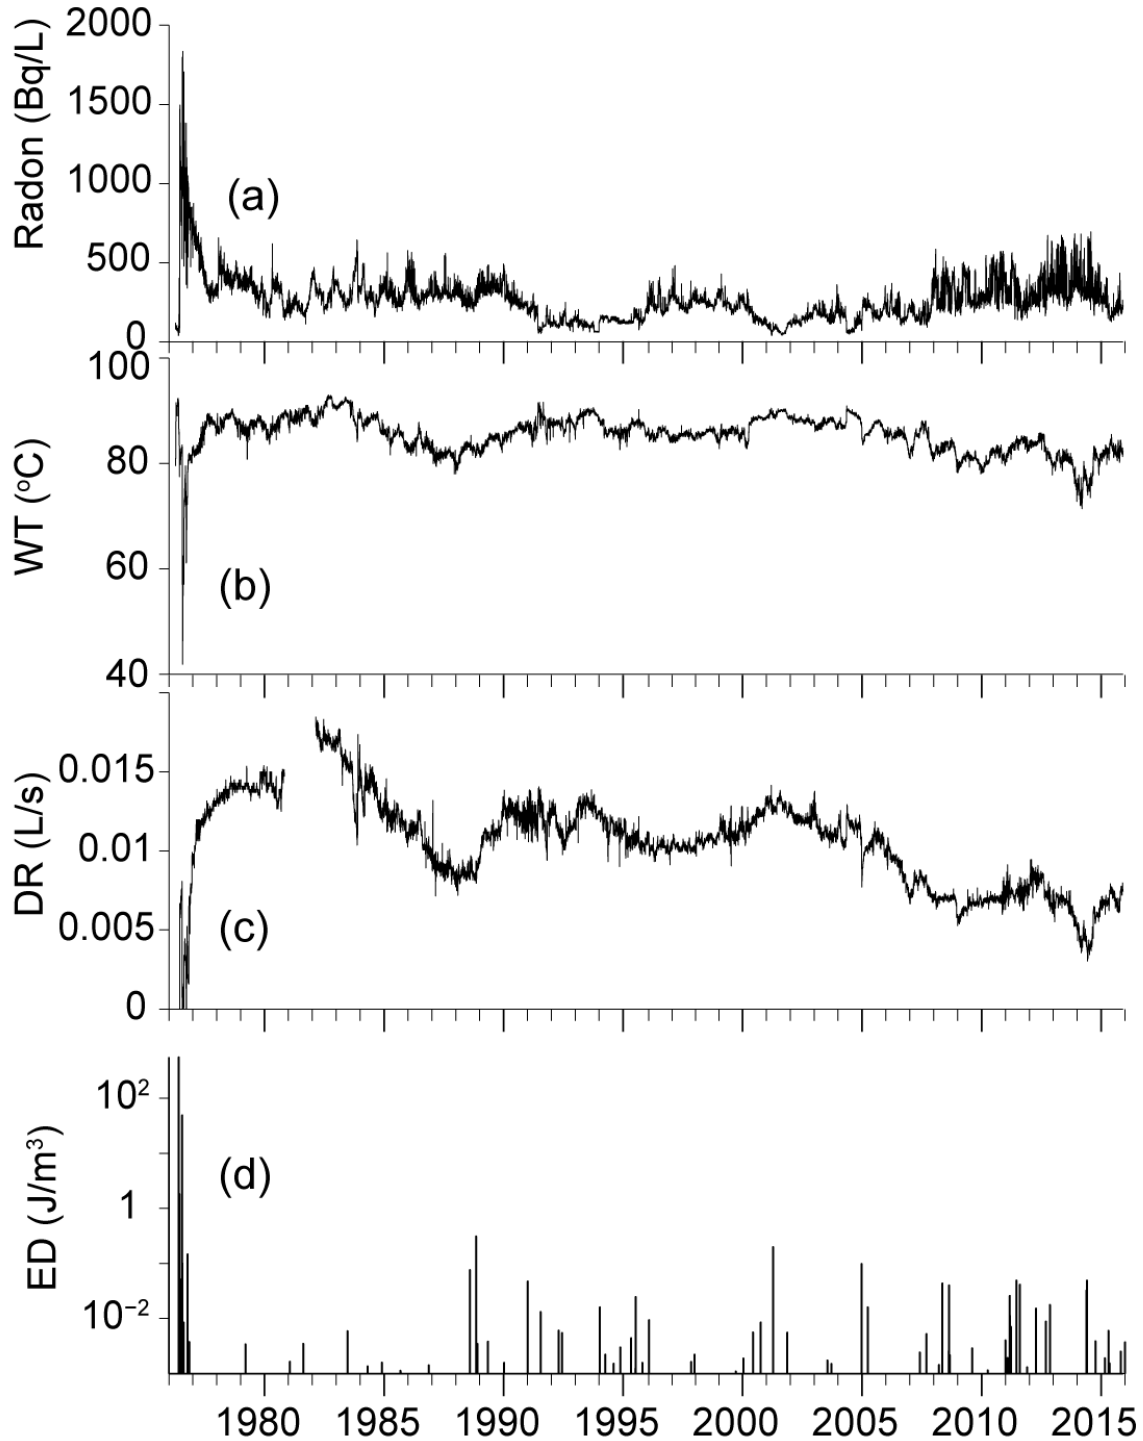

44  
 45 **Fig. S1.** Time series of daily groundwater parameters at the BLZ hot spring site, from top to bottom panels: (a) Radon,  
 46 (b) Water Temperature WT, (c) Discharge rate DR, (d) Earthquakes with energy density ED larger than 10<sup>-3</sup>J/m<sup>3</sup>.  
 47

48 In order to identify hydrological response to earthquakes, 84 earthquakes with energy  
 49 density > 10<sup>-3</sup> J/m<sup>3</sup> at BLZ hot spring site were examined. For each of the 84 earthquakes

50 it was checked whether coseismic radon changes were induced by the earthquakes after  
51 taking the influence of precipitation into account. Only the earthquakes listed in [table S2](#)  
52 induced apparent coseismic radon changes. Additional to the series of events in 1976,  
53 hydrological changes induced by earthquakes were identified following seismic events in  
54 1996, 2004, and 2005. Totally, the events with energy density  $> 0.1 \text{ J/m}^3$  at BLZ can induce  
55 observably hydrological changes at BLZ site. While 17 out of 19 events with energy  
56 density from 0.01 to  $0.1 \text{ J/m}^3$  did not induce obvious hydrological change at BLZ site. For  
57 example, the Wenchuan 2008  $M_w 7.9$  earthquake with energy density of  $\sim 0.05 \text{ J/m}^3$  also  
58 did not induce obvious changes in the hydrological parameters of BLZ site.

59 Extremely large changes were caused by the 1976 Longling  $M_w 7.0$  earthquake and  
60 its aftershocks (see [Fig. S1-2](#)): Radon increased co- and postseismically from about 50  
61 Bq/L to 1,800 Bq/L. The increase was not continuous, but occurred as a sequence of step-  
62 like increases and decays in relation to the main shock and the following aftershocks. The  
63 radon increases were accompanied by drops in the water temperature. The largest changes  
64 in all parameters were not related to the main shock, but to the  $M=6.3$  event in July 1976:  
65 radon increased by 1,273 Bq/L, temperature dropped by  $41^\circ\text{C}$ , and the spring discharge  
66 (measurements started in June 1976, i.e. no data available for the main event) dropped from  
67 0.008 L/s to almost zero.

68 BLZ is located in the near-field of the 1976 earthquake series (about 14 km from the  
69 major earthquake epicenter). Thus, both static and dynamic pore pressure variations were  
70 expected to be significant. We used the computer code “tfcmb” (developed by one of the  
71 co-authors R. Wang; the program is freely available from the author upon request) based  
72 on the elastic dislocation model <sup>1</sup> to calculate the static co-seismic volumetric strain  
73 changes under un-drained conditions. Pore pressure changes are assumed to relate to the  
74 confined pressure with the Skempton parameter. The Poisson ratio was set to 0.25, the  
75 shear modulus to 30GPa, the Skempton parameter to 0.8, and the friction coefficient to 0.7.  
76 Harvard CMT solutions were used as input parameters. The two events which both  
77 occurred on 1976 May 29 had by far the largest impact on BLZ: The pore pressure dropped  
78 by 0.33 bar and 0.50 bar following the  $M_w=6.6$  event at 12:23:29 and the  $M_w=6.6$  at  
79 14:00:33, respectively. The corresponding volume strain changes are  $8.27 \times 10^{-07}$  and  
80  $1.24 \times 10^{-06}$ . The  $M_w=6.1$  event of 1976 May 31 had a minor effect at BLZ: The pore

81 pressure dropped by 0.07 bar corresponding to a static strain change of  $1.78 \times 10^{-07}$ . The  
 82 same applies for the  $M_w=6.1$  event of 1976 July 21 which caused a pore pressure increase  
 83 of 0.07 bar corresponding to a static strain change of  $-1.69 \times 10^{-07}$ . Thus, static pore pressure  
 84 changes likely do not explain the observations. It is fair to note, that the modelling results  
 85 strongly depend on the location of the ruptured faults with respect to the monitoring site.

86 Qualitatively, the same behavior had been observed after the Lijiang  $M_w$  6.6  
 87 earthquake of 1996 (Fig. S3) and the 2004 Sumatra  $M_w$  9.1 earthquake (Fig. S4). A  
 88 summary of all induced variations is given in table S2. From the timeseries presented in  
 89 Fig. S2-S4 it is evident that the response is relatively fast (days to weeks), while the  
 90 recovery to the pre-earthquake values is slow, indicating that hydrogeological parameters  
 91 recovered to background levels within one year.

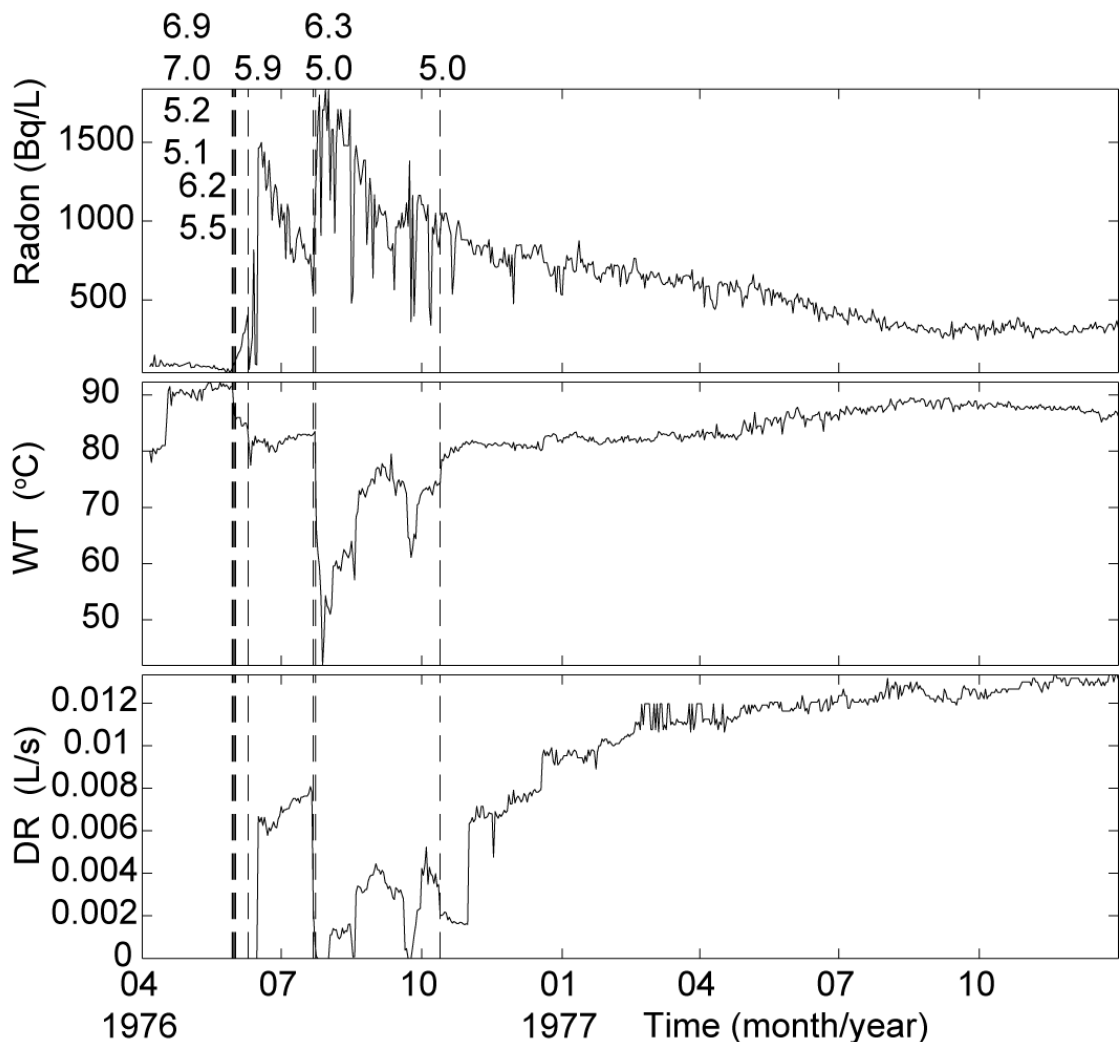

92  
 93 **Fig. S2.** Changes and recovery processes of radon, water temperature WT, and discharge rate DR caused by the 1976

94 *Longling Mw7.0 earthquakes series. Detailed information about the earthquakes is listed in table S3. Radon and*  
95 *temperature were observed since 1976 April 6, discharge rate measurements started 1976 June 16.*  
96

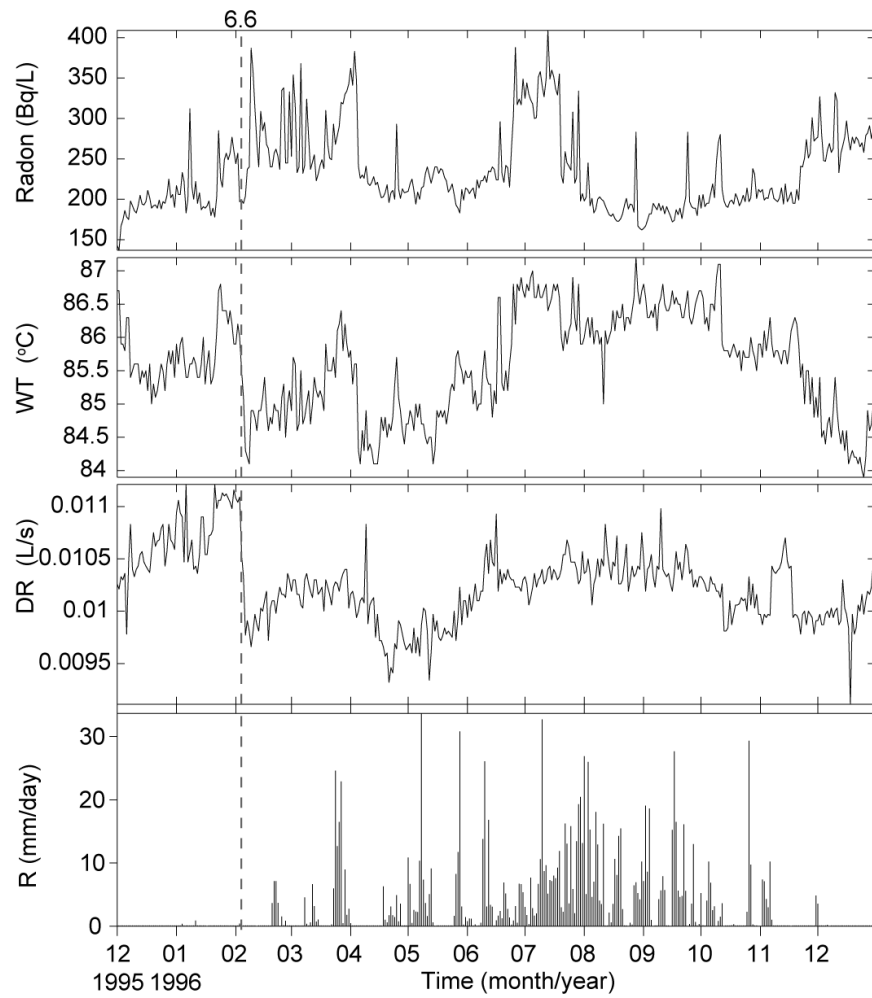

97

98 **Fig. S3.** *Changes and recovery processes of radon, water temperature, and discharge rate caused by the M=6.6*99 *earthquake of 1996 February 3 which occurred at a distance of 334 km. Rain fall is shown for comparing the effect of*  
100 *earthquake.*

101

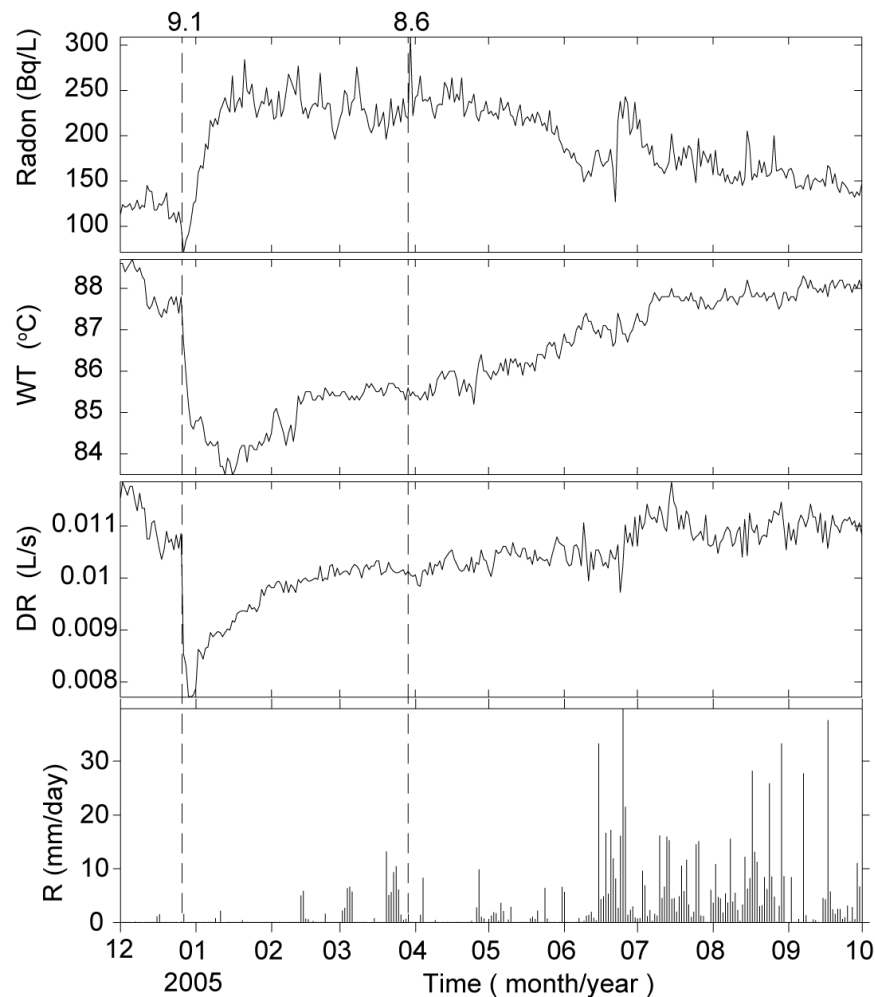

102

103 *Fig. S4. Changes and recovery processes of radon, water temperature, and discharge rate caused by the 2004 Sumatra*  
 104 *M<sub>w</sub> 9.1 and the 2005 Sumatra M<sub>w</sub> 8.6 earthquakes. Detailed information about the earthquakes is listed in table S3.*

105

*Rain fall is shown for comparing the effect of earthquake.*

106

### 107 **Radon solubility**

108 The solubility of a gas in a liquid is temperature-dependent and proportional to the partial  
 109 pressure of the gas. The solubility coefficient  $S$  for radon can be estimated from an  
 110 empirically derived formula (see e.g. Koike et al.<sup>2</sup>, for further discussions)

111

$$S = 0.1057 + 0.405 \cdot \exp(-0.0502 \cdot T)$$

112 The tabulated solubilities usually refer to normal pressure conditions (1013.25 hPa), but  
 113 the average barometric pressure at BLZ is 870 hPa. Taking the water vapour pressure at  
 114 the BLZ altitude (1,280 m a.s.l.) into account, the actual radon solubilities at BLZ are even  
 115 lower, i.e. 14% less radon can be kept in solution compared to sea-level. The quasi-decadal  
 116 maxima and minima of the water temperature are 93°C and 71°C, corresponding to radon

117 solubility coefficients of 0.092 and 0.099, respectively (Fig. S5). Thus, at 71°C about 0.7%  
 118 more radon can be dissolved in water as compared to 93°C. At the same time, radon  
 119 concentrations varied from 41 Bq/L during high-temperature periods up to 696 Bq/L during  
 120 times of low water temperatures. The large radon range likely cannot be explained by  
 121 temperature-dependent solubility alone.

122

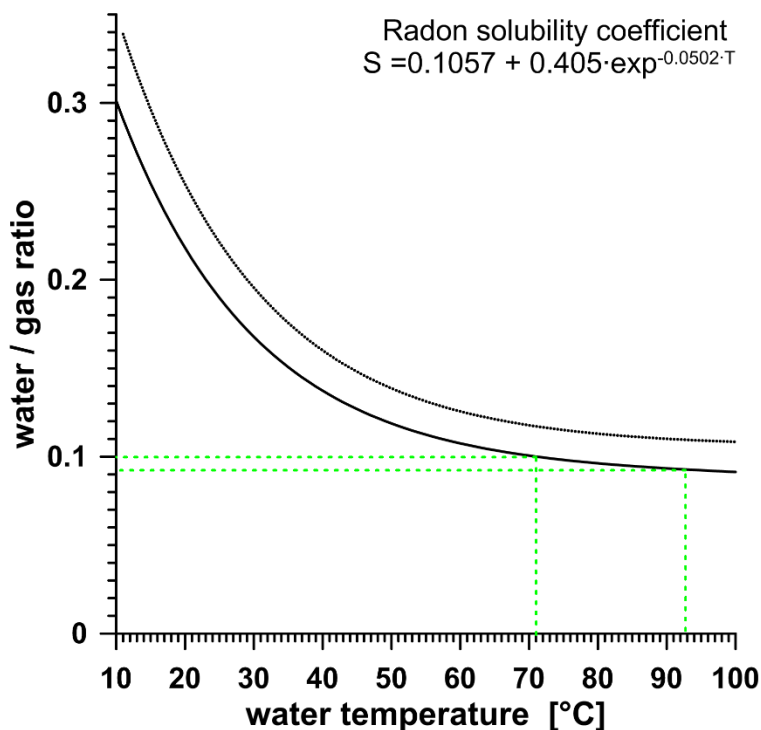

123

124 *Fig. S5 Radon solubility as a function of temperature T. The black dashed line refers to sea-level conditions (1013.25*  
 125 *hPa), whereas the black line refers to the average barometric pressure of 870 hPa at the altitude of BLZ (1280 m).*

126 *Green dotted lines indicate the decadal maxima (93°C) and minima (71°C) water temperatures at BLZ, respectively.*

127

## 128 References

129 1 Okada, Y. Internal deformation due to shear and tensile faults in a half-space. *Bulletin*  
 130 *of the Seismological Society of America* **82**, 1018-1040 (1992).

131 2 Koike, K., Yoshinaga, T. & Asaue, H. Characterizing long-term radon concentration  
 132 changes in a geothermal area for correlation with volcanic earthquakes and reservoir  
 133 temperatures: A case study from Mt. Aso, southwestern Japan. *Journal of*  
 134 *Volcanology and Geothermal Research* **275**, 85-102,  
 135 doi:<http://dx.doi.org/10.1016/j.jvolgeores.2014.02.007> (2014).  
 136
